# Supplementary material
Source: publisher figshare collection journal article supplement (https://tandf.figshare.com/ndownloader/files/22904852)
Supplement: Supplementary file 1 [file 22904852]

**Supplemental Information****: An iterative approach converting extinction enhancement from water uptake to physical growth factor for clay aerosol and the effect of refractive index**

Jillian L. Morang and Margaret E. Greenslade*

Department of Chemistry, University of New Hampshire, Durham, NH, USA

**Correspondence to:** Margaret E. Greenslade (margaret.e.greenslade@unh.edu)

***Powdered clay samples***


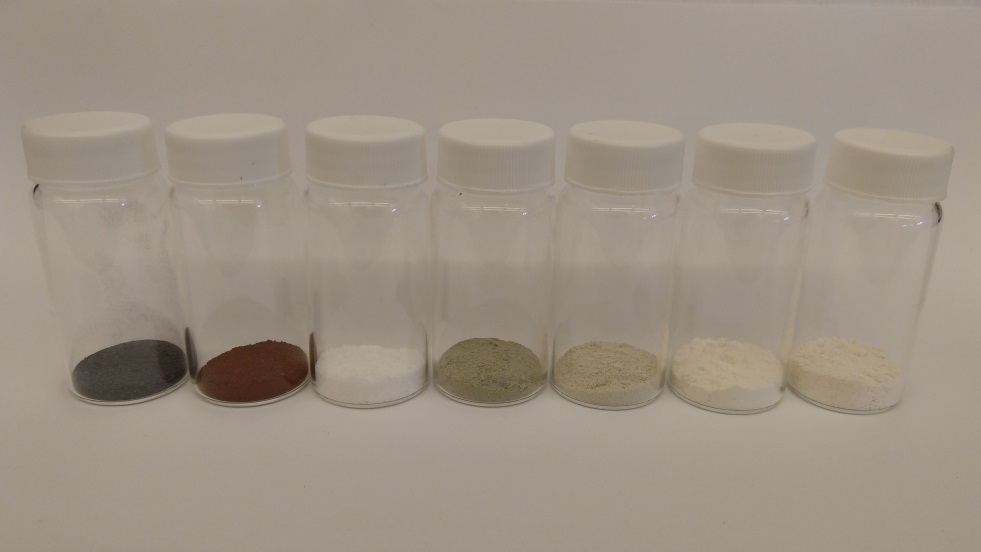


**Figure S1.** A photograph of clay samples used in these experiments (from L to R, illite, Na-rich montmorillonite, and montmorillonite).

Figure S1 shows the variability in the color of the powdered clay samples used in these experiments. The samples were obtained from Source Clays Repository and are catalogued as montmorillonite (STx-1b), Na-rich montmorillonite (SWy-2), and illite (IMt-1). The montmorillonite samples were used as received while the illite was ground to a powder.
